# Supplementary material for: Similar neural and perceptual masking effects of low-power optogenetic stimulation in primate V1
Source: eLife journal article supplement (doi:10.7554/elife.68393), 2022-01-04
Supplement: supp [file elife_poa_e68393_Transparent_Reporting_File.pdf › elife_poa_e68393_Transparent_Reporting_File.pdf]

## eLife's transparent reporting form

We encourage authors to provide detailed information *within their submission* to facilitate the interpretation and replication of experiments. Authors can upload supporting documentation to indicate the use of appropriate reporting guidelines for health-related research (see [EQUATOR Network](#)), life science research (see the [BioSharing Information Resource](#)), or the [ARRIVE guidelines](#) for reporting work involving animal research. Where applicable, authors should refer to any relevant reporting standards documents in this form.

If you have any questions, please consult our Journal Policies and/or contact us: [editorial@elifesciences.org](mailto:editorial@elifesciences.org).

### Sample-size estimation

- You should state whether an appropriate sample size was computed when the study was being designed
- You should state the statistical method of sample size computation and any required assumptions
- If no explicit power analysis was used, you should describe how you decided what sample (replicate) size (number) to use

Please outline where this information can be found within the submission (e.g., sections or figure legends), or explain why this information doesn't apply to your submission:

Two animals were examined to verify consistency of experimental approach and results. The number of recordings were based on previous experience; no statistical method was used to predetermine sample size. The number of trials included in the analysis are indicated in each figure.

### Replicates

- You should report how often each experiment was performed
- You should include a definition of biological versus technical replication
- The data obtained should be provided and sufficient information should be provided to indicate the number of independent biological and/or technical replicates
- If you encountered any outliers, you should describe how these were handled
- Criteria for exclusion/inclusion of data should be clearly stated
- High-throughput sequence data should be uploaded before submission, with a private link for reviewers provided (these are available from both GEO and ArrayExpress)

Please outline where this information can be found within the submission (e.g., sections or figure legends), or explain why this information doesn't apply to your submission:

Fig. 2 and associated supplement figures (Fig. 2-S1 and Fig. 2-S2) outline our experimental timeline. Each experimental condition (optostim power level x cortical site) was repeated at least three times (in separate days) in each animal, pairing with a visual only block each day. The number of trials collected each day varied between 200-600 trials (typically 400) depending on the animal's willingness to work. Trials were excluded when the monkey did not follow the task routine, when EKG signal was noisy, and when excessive motion artefact was detected in the imaged data. The total numbers of trials used are reported in each figure. From the collected data, bootstrapped resampling was used to estimate statistical significance, and this is outlined in the Statistics subsection of Methods.

## Statistical reporting

- Statistical analysis methods should be described and justified
- Raw data should be presented in figures whenever informative to do so (typically when N per group is less than 10)
- For each experiment, you should identify the statistical tests used, exact values of N, definitions of center, methods of multiple test correction, and dispersion and precision measures (e.g., mean, median, SD, SEM, confidence intervals; and, for the major substantive results, a measure of effect size (e.g., Pearson's r, Cohen's d)
- Report exact p-values wherever possible alongside the summary statistics and 95% confidence intervals. These should be reported for all key questions and not only when the p-value is less than 0.05.

Please outline where this information can be found within the submission (e.g., sections or figure legends), or explain why this information doesn't apply to your submission:

The Statistics subsection of Methods describes our statistical approach.

(For large datasets, or papers with a very large number of statistical tests, you may upload a single table file with tests, Ns, etc., with reference to sections in the manuscript.)

## Group allocation

- Indicate how samples were allocated into experimental groups (in the case of clinical studies, please specify allocation to treatment method); if randomization was used, please also state if restricted randomization was applied
- Indicate if masking was used during group allocation, data collection and/or data analysis

Please outline where this information can be found within the submission (e.g., sections or figure legends), or explain why this information doesn't apply to your submission:

Our study had only one experiment group of animals; multiple experiment groups were not necessary. Experiments were repeated multiple times with different experimental conditions in each animal ran on separate days. The order of blocks within a day was pseudorandom. The animals were not given cues to the contrast of the visual target nor the optostim power level of each trial.

## Additional data files ("source data")

- We encourage you to upload relevant additional data files, such as numerical data that are represented as a graph in a figure, or as a summary table
- Where provided, these should be in the most useful format, and they can be uploaded as "Source data" files linked to a main figure or table
- Include model definition files including the full list of parameters used
- Include code used for data analysis (e.g., R, MatLab)
- Avoid stating that data files are "available upon request"

Please indicate the figures or tables for which source data files have been provided:

The data and Matlab code for visualization are available on Dryad Digital Repository, doi:10.5061/dryad.00000003h.
